# Supplementary material for: Maternal RANKL Reduces the Osteopetrotic Phenotype of Null Mutant Mouse Pups
Source: MDPI journal article supplement (doi:10.3390/jcm7110426), 2018-11-08
Supplement: s1 [file s1]

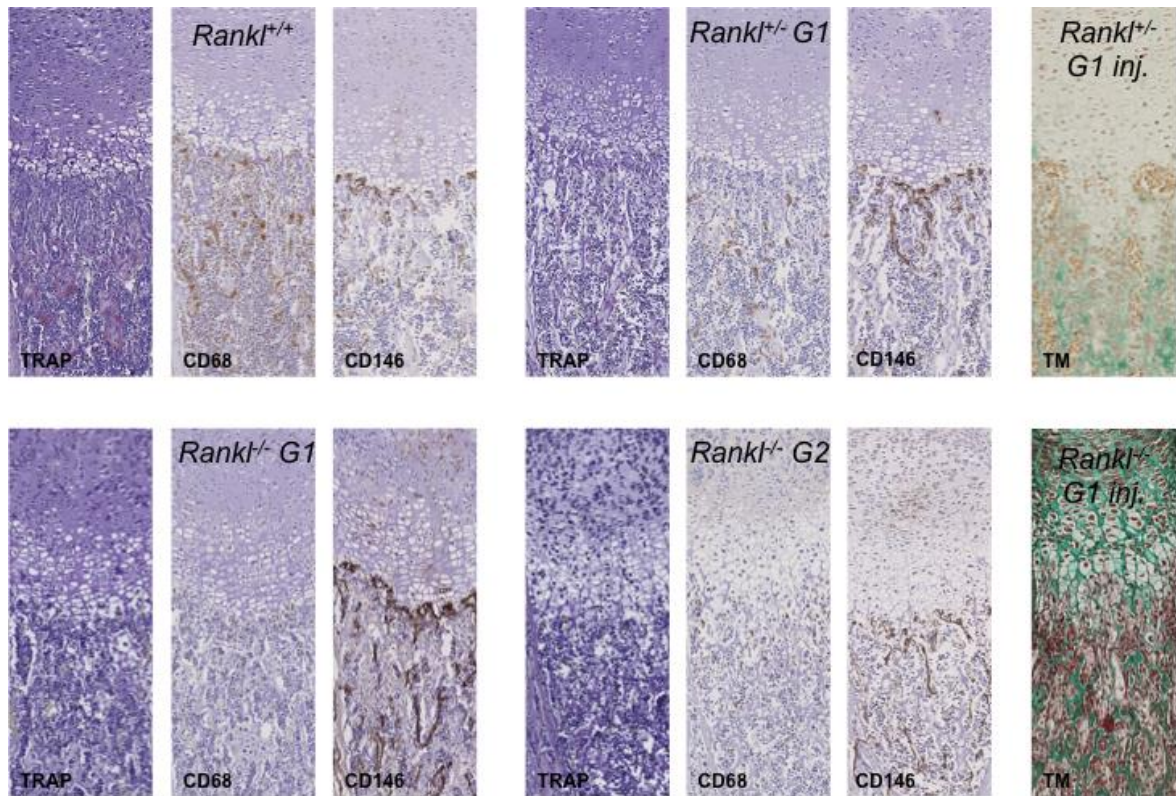

**Supplementary Figure S2.** Enlargements of Figures 4 and 7 enabling to visualize the different tibia growth plate cartilage phenotypes at the cellular level. Magnification X100.
